# Supplementary material for: Norovirus infection results in eIF2α independent host translation shut-off and remodels the G3BP1 interactome evading stress granule formation
Source: PubMed Central journal article supplement (PMC6964919; doi:10.1371/journal.ppat.1008250), 2020-01-06

# Supplementary Figure 4

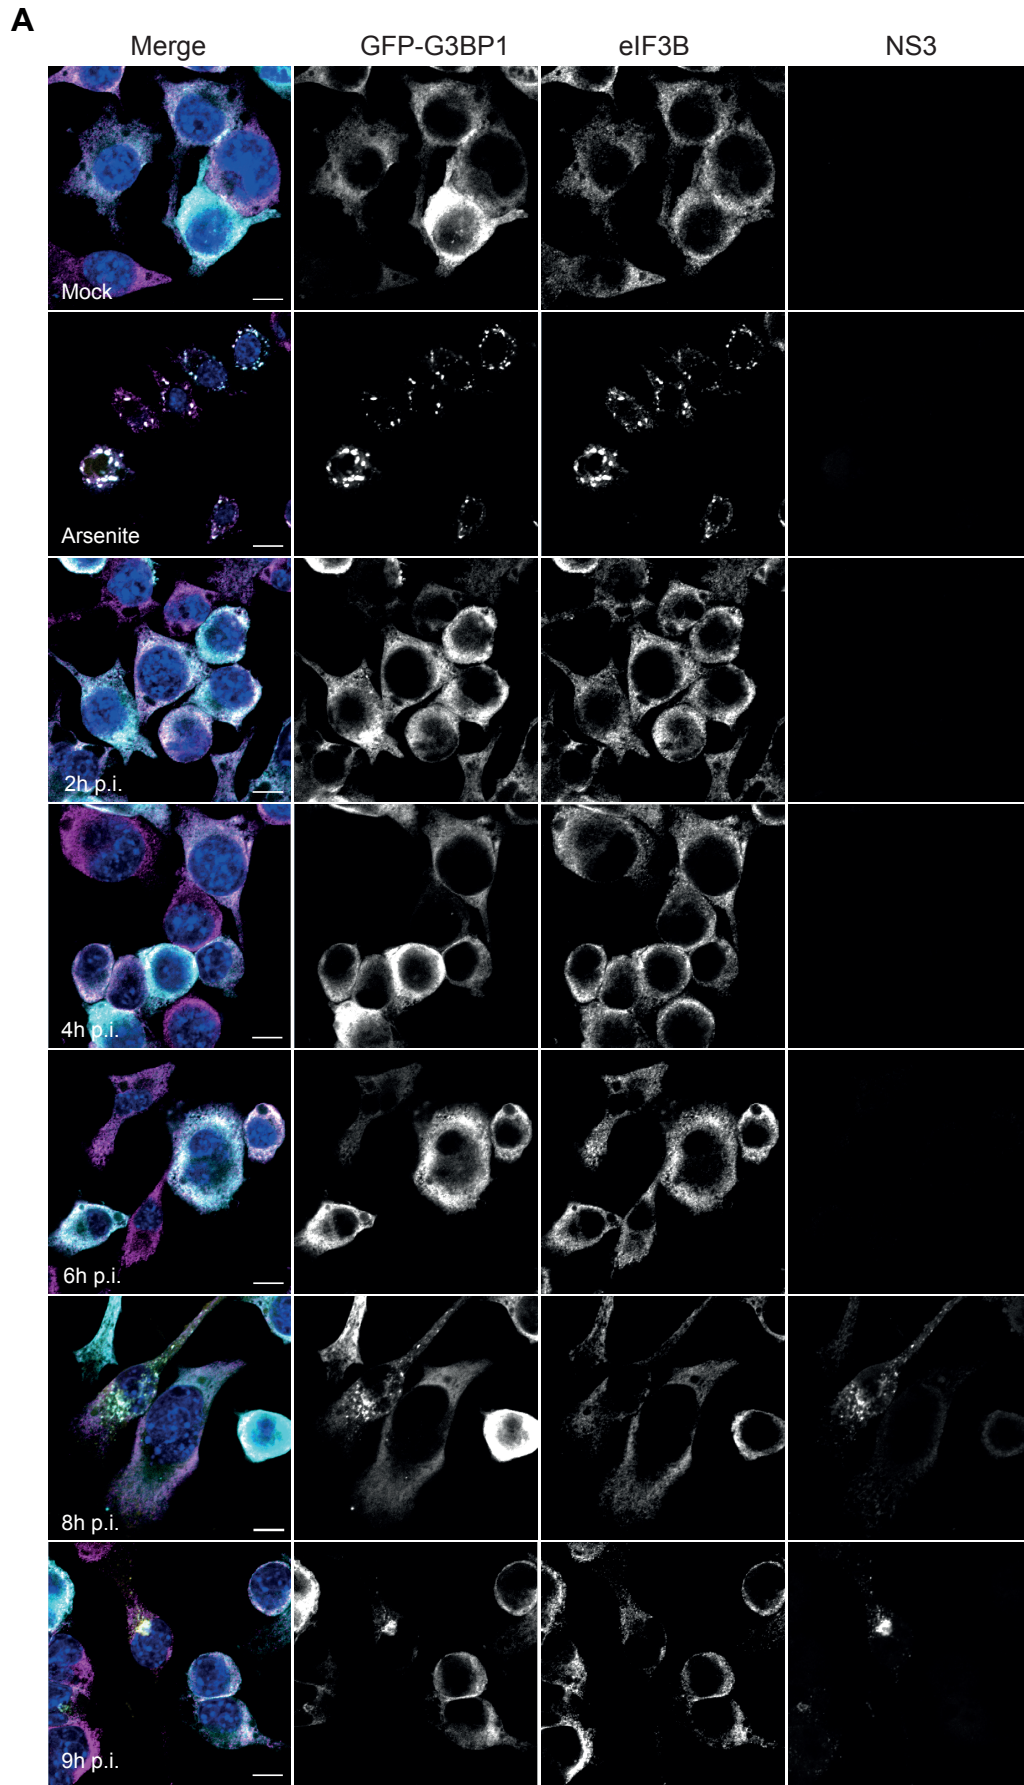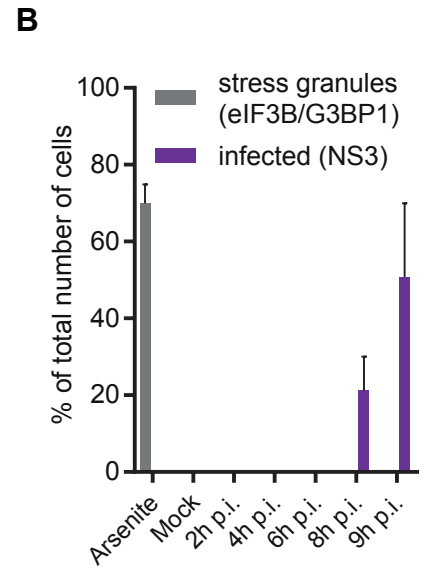

Supplement: ppat.1008250.s005.pdf [file ppat.1008250.s005.pdf]
